# Supplementary material for: Sonic hedgehog signaling regulates reciprocal epithelial-mesenchymal interactions controlling palatal outgrowth
Source: Oxford University Press journal article supplement (doi:10.1242/dev.028167), 2009-03-20
Supplement: dev028167tables1.pdf [file dev028167tables1.pdf]

**Table S1. Cell proliferation index in *K14-Cre;Shh<sup>cln</sup>* and control palatal shelves at E13.5**

|       | 1               | 2              | 3               | 4               |
|-------|-----------------|----------------|-----------------|-----------------|
| CK-PE | 0.3696±0.03910  | 0.3728±0.03530 | 0.3727±0.02652  | 0.3466±0.02205  |
| MT-PE | 0.1968±0.03670* | 0.3929±0.02548 | 0.3261±0.01549* | 0.3540±0.02367  |
| CK-PM | 0.3221±0.02357  | 0.3981±0.05611 | 0.4002±0.03461  | 0.4162±0.05256  |
| MT-PM | 0.3018±0.03391  | 0.4100±0.05984 | 0.3153±0.03648* | 0.2135±0.02806* |

\*Mutant samples with a significant difference in cell proliferation index from the control samples ( $P<0.05$ ). Data were expressed as ratios of BrdU-labeled nuclei to total cell nuclei  $\pm$ s.d. Data were recorded from 10 continuous frontal sections through the E13.5 palatal shelves anterior to the maxillary first molar tooth germs in comparable positions in control and *K14-Cre;Shh<sup>cln</sup>* mutant embryos. CK-PE, control palatal epithelium; MT-PE, *K14-Cre;Shh<sup>cln</sup>* mutant palatal epithelium; CK-PM, control palatal mesenchyme; MT-PM, mutant palatal mesenchyme.
